# Supplementary material for: Human Cancer-Associated Mutations of SF3B1 Lead to a Splicing Modification of Its Own RNA
Source: PubMed Central journal article supplement (PMC7139785; doi:10.3390/cancers12030652), 2020-03-11
Supplement: cancers-12-00652-s001.pdf [file cancers-12-00652-s001.pdf]

# Human cancer-associated mutations of SF3B1 lead to a splicing modification of its own RNA

Tiffany Bergot<sup>1</sup>, Eric Lippert<sup>1,2,3</sup>, Nathalie Douet-Guilbert<sup>1,2,3,4</sup>, Séverine Commet<sup>1</sup>, Laurent Corcos<sup>1</sup> and Delphine Bernard<sup>1,2,\*</sup>

<sup>1</sup> Univ Brest, Inserm, EFS, UMR1078, GGB, F-29200 Brest, France

<sup>2</sup> Centre de Ressources Biologiques du CHRU de Brest, France

<sup>3</sup> Hématologie Biologique, CHRU de Brest, France

<sup>4</sup> Génétique, CHRU de Brest, France

## **Supplementary Materials and Methods**

### **Immunofluorescence**

After 48h of doxycycline induction, 300 000 cells were cultured on a coverslip coated with poly-L-lysine and incubated overnight in RPMI 1640 medium (Gibco), supplemented with 10% fetal bovine serum, 2 mM of L-glutamine and with 2 µg/mL of doxycycline. Cells were fixed with 4% para-formaldehyde and permeabilized with a PBS, 0,2% triton solution. Following incubation with primary anti-FLAG antibodies (1:1000, #F3165, Sigma) and secondary antibodies (1:1000, A-21121, Invitrogen), assembly between slide and cover-slide was done with the liquid mountant SlowFade™ Gold Antifade Mountant with DAPI (Invitrogen).

## Supplementary figure legends

**Table S1.** Features of the MDS patients included in this study.

**Table S2.** Primers used in this study.

**Figure S1.** Complementary results obtained in K562 and UT-7 cells upon inducible expression of SF3B1<sup>K700E</sup> or upon transitory expression of other important SF3B1 variants. (A) - Detection of SF3B1 proteins in K562 cells following inducible expression of SF3B1<sup>WT</sup> or SF3B1<sup>K700E</sup>. The immunoblot shows three independent K562 cell populations expressing SF3B1<sup>WT</sup> (left) or SF3B1<sup>K700E</sup> (right) (I: induced, NI: non-induced). (B) Detection of SF3B1 proteins in K562 expressing distinct SF3B1 variants. K562 cells were transiently transfected by plasmids expressing SF3B1<sup>WT</sup>, SF3B1<sup>K700E</sup>, SF3B1<sup>E622D</sup>, SF3B1<sup>H662Q</sup> and SF3B1<sup>K666E</sup>. (C) Detection of SF3B1 proteins in UT-7 cells following inducible expression of SF3B1<sup>WT</sup> or SF3B1<sup>K700E</sup>. The immunoblot shows two independent UT-7 cell populations expressing SF3B1<sup>WT</sup> (left) or SF3B1<sup>K700E</sup> (right) (I: induced, NI: non-induced). In (A-C), total SF3B1 proteins (endogenous and exogenous) were detected using anti-SF3B1 antibody. Plasmid-encoded SF3B1 was detected using anti-FLAG antibody.

**Figure S2.** SF3B1<sup>insFLAG</sup> proteins are correctly addressed to the nucleus. Immunofluorescence staining of SF3B1-FLAG proteins in inducible K562 cell lines expressing various SF3B1 constructs. Nuclei were stained with DAPI.

**Figure S3.** Splicing analysis of RBM5, DUSP11, CCNA2 and STK6 in inducible K562 cell lines expressing shSF3B1 alone or in combination with various SF3B1 constructs. (A) Analysis of splicing events known to be specifically altered upon SF3B1 loss of function (RBM5, DUSP11) or SF3B1<sup>mut</sup> background (ENOSF1, TMEM14C, DPH5). (B) Quantification of CCNA2 or STK6 exon skipping was done by RT-qPCR, using primers allowing specific quantification of exon skipping events in CCNA2 (exon 5) and STK6 (exons 4, 5 and 6) transcripts, normalized to GAPDH.

**Figure S4.** Expression of the main disease-related SF3B1 mutations does not affect growth of the *Schizosaccharomyces pombe prp10-1* strain. (A) Multiple alignment of the predominantly affected SF3B1 protein region in MDS (ClustalW software). The mouse (MOUSE), human (HUMAN), *Schizosaccharomyces pombe* (SCHPO) and *Saccharomyces cerevisiae* (YEAST) sequences are presented. The amino acids substitutions E622, R625, K666 and K700 found specifically in myelodysplastic syndromes are indicated in color. The lysine K700 residue, the most commonly affected in MDS, is preserved in *S. pombe* but not in *S. cerevisiae*. (B) *prp10-1* mutant cells were transformed with the empty vector pREP41, or a pREP41-HA expressing the wild type or mutated alleles of SpSAP155, namely the counterparts of E622N, H662Q, K666N (R666N) and K700E. Streaks from independent transformants were made on EMM 2% glucose, replica-plated on EMM 2% glucose and cultured at 26°C or 37°C. (C) RT-PCR splicing analysis of TFIID and RPL7 transcripts in the *prp10-1* strain expressing different versions of SpSAP155. Transformants were cultured at 26°C and subjected to a temperature switch at 37°C for 2 hours. RNA was extracted and analyzed by RT-PCR using specific primers allowing the detection of both spliced and un-spliced mRNA.

**Figure S5.** Uncropped blots corresponding to Figure 2A and Figure 2C. Densitometric ratios of SF3B1 or SF3B1-FLAG to GAPDH or  $\beta$ -actin are indicated for each lane.

**Figure S6.** Uncropped blots corresponding to Figure S1A, Figure S1B and Figure S1C. Densitometric ratios of SF3B1 or SF3B1-FLAG to GAPDH or  $\beta$ -actin are indicated for each lane.

Supplementary figures

Bergot et al.

Figure S1

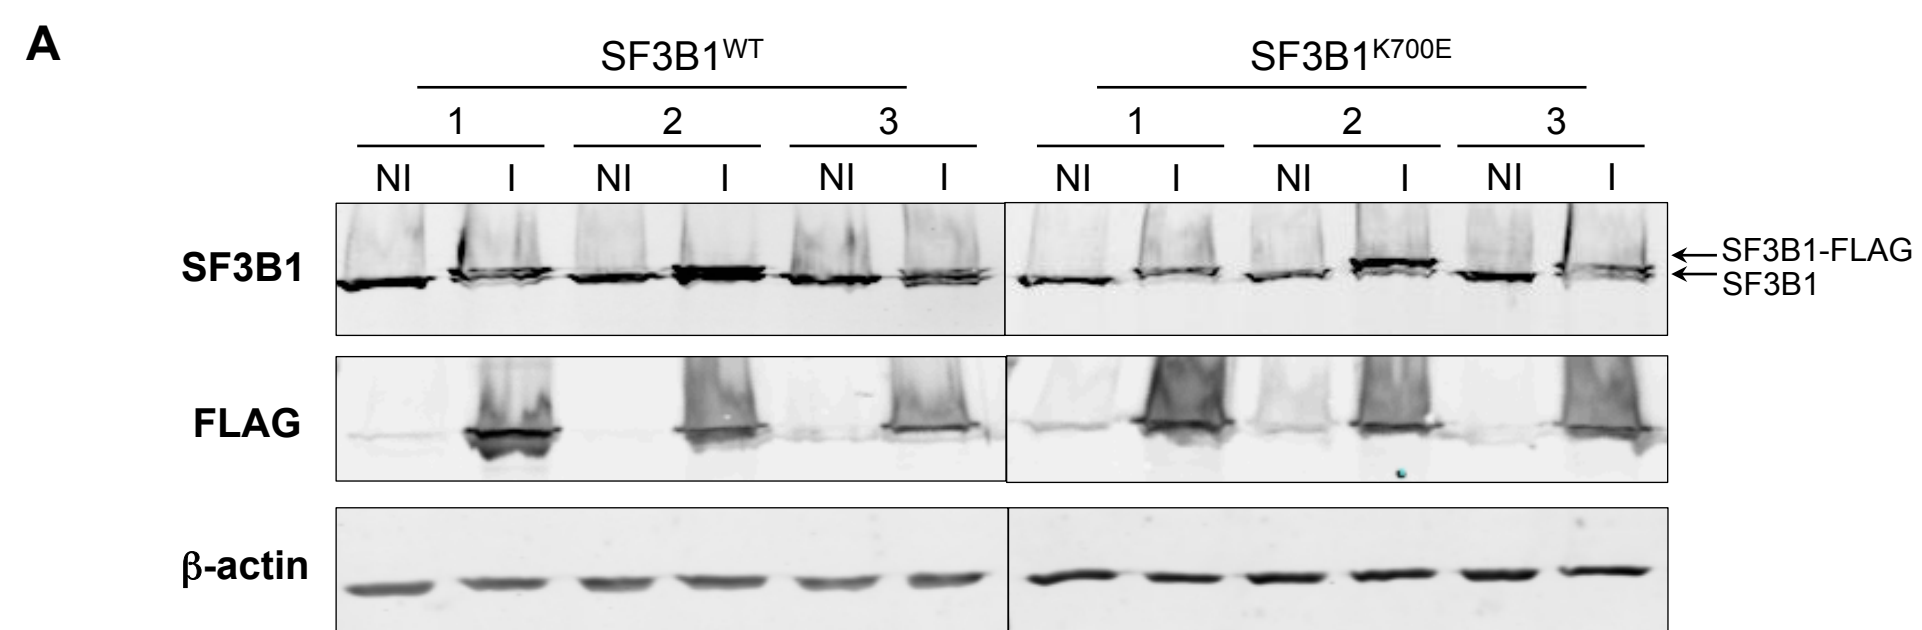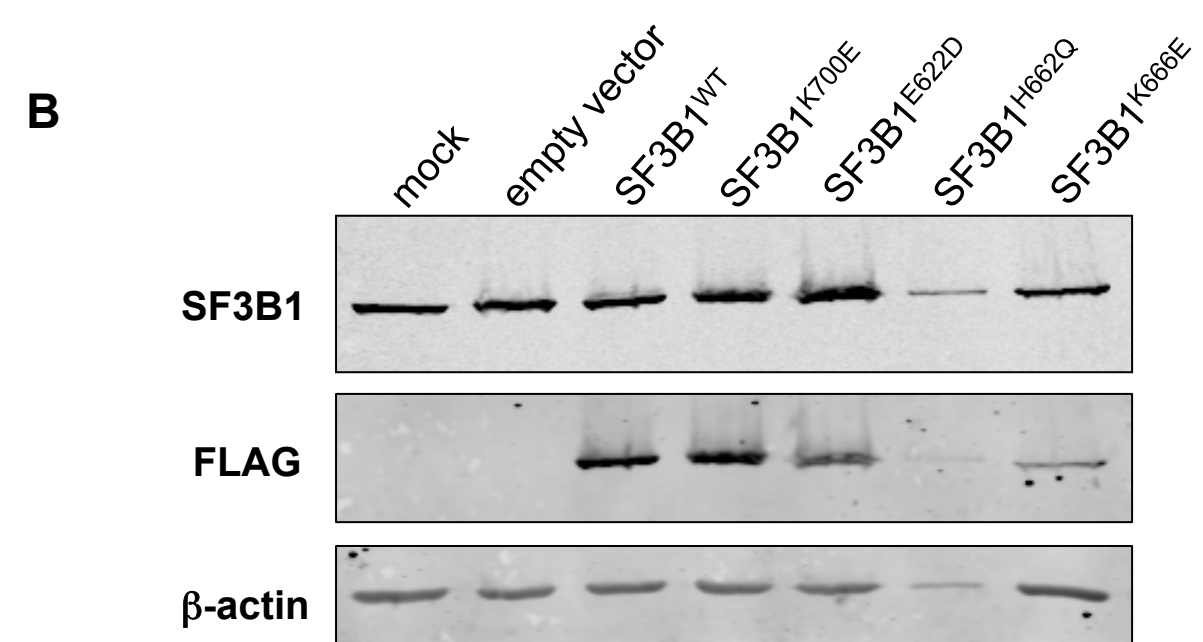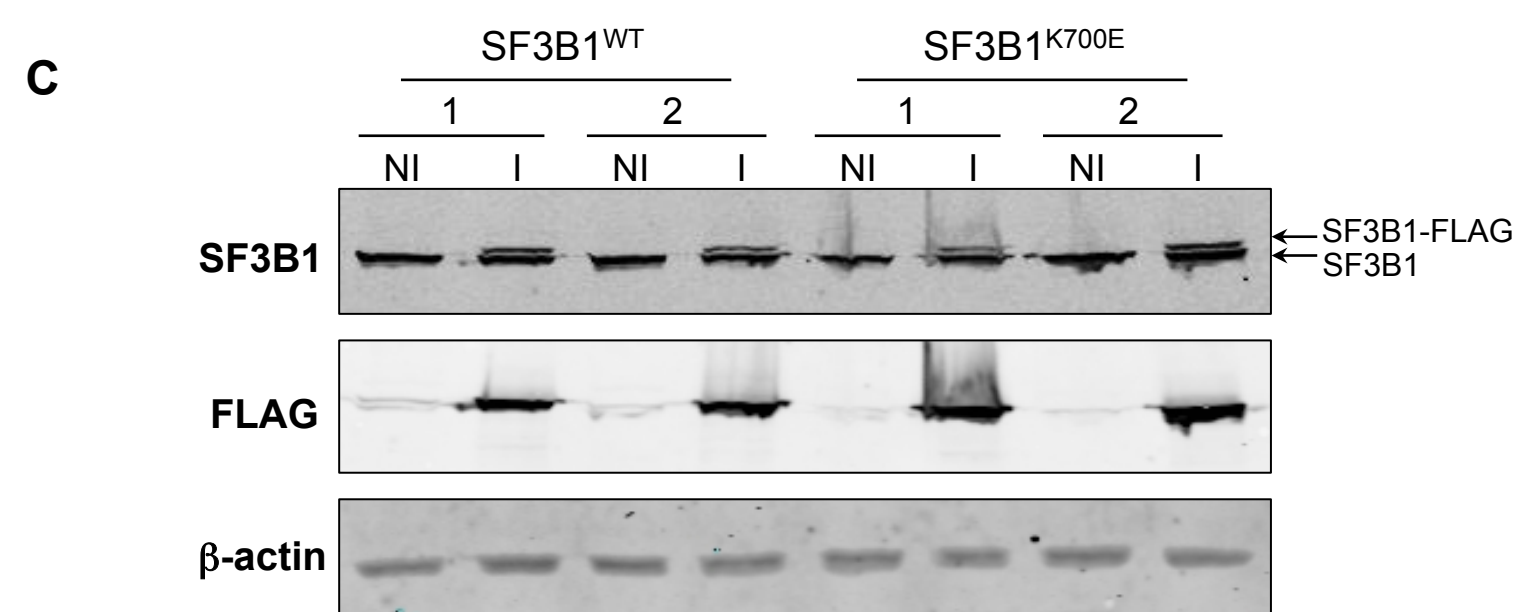

Figure S2

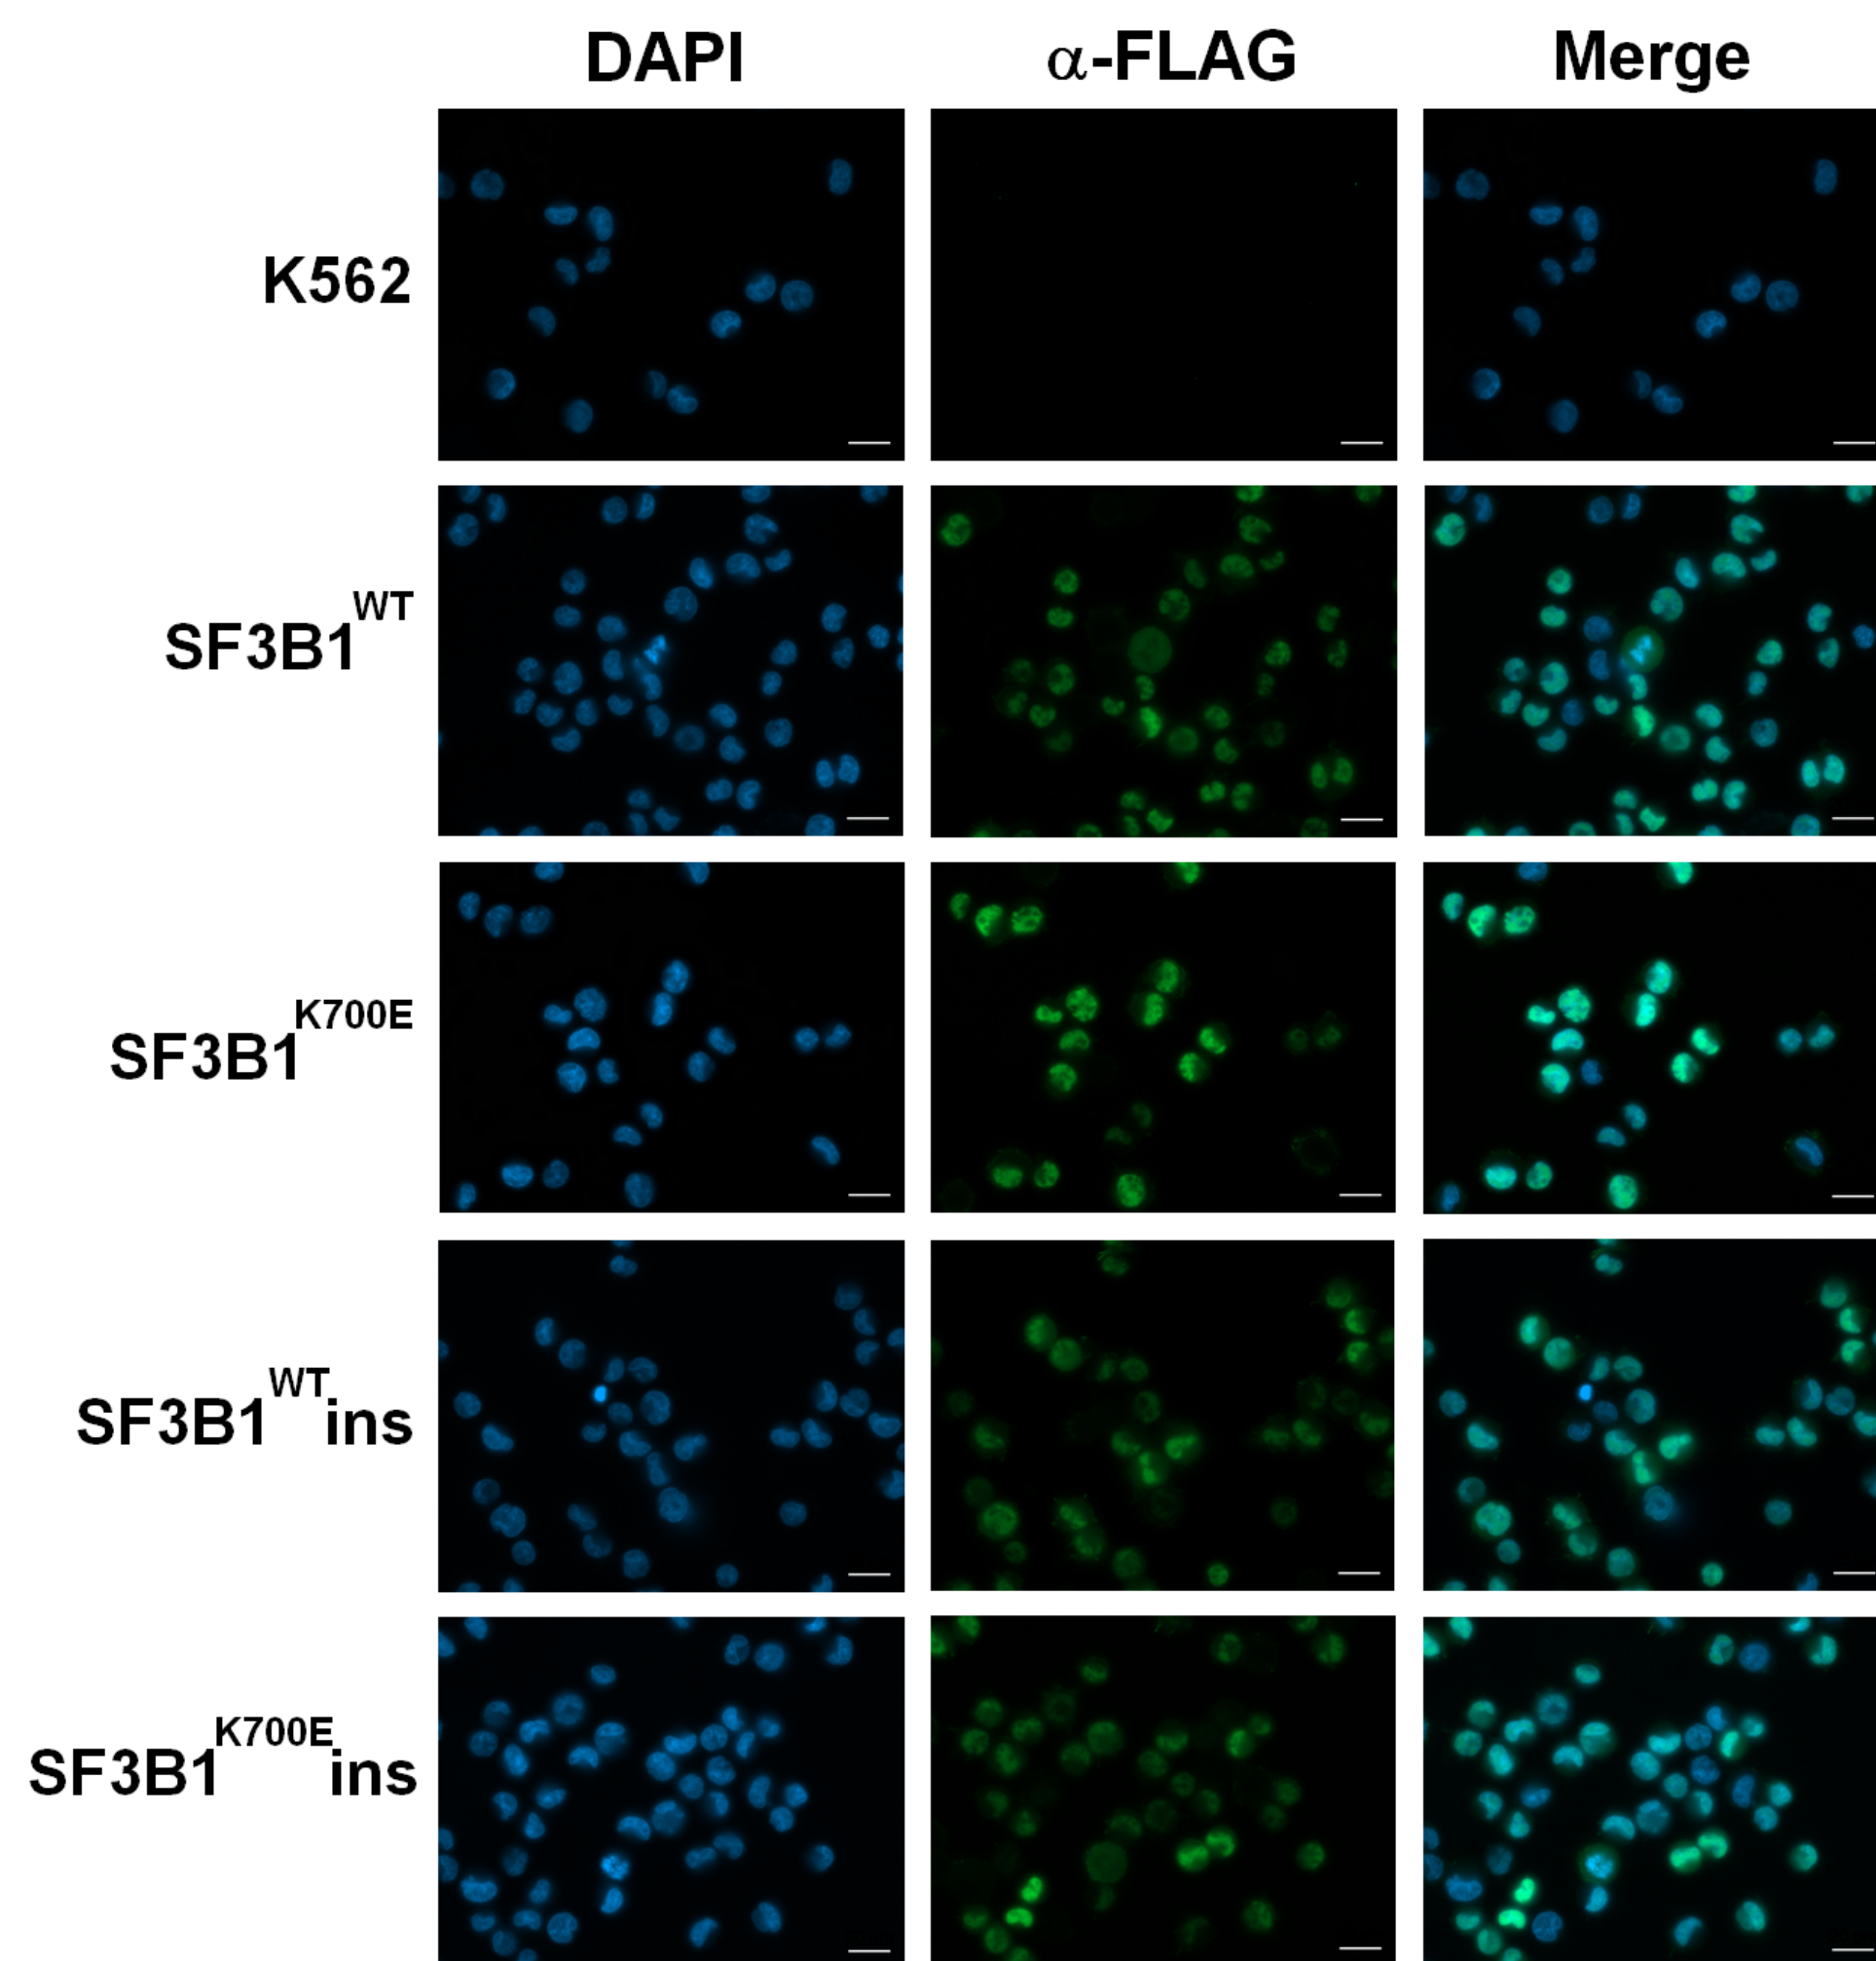

A

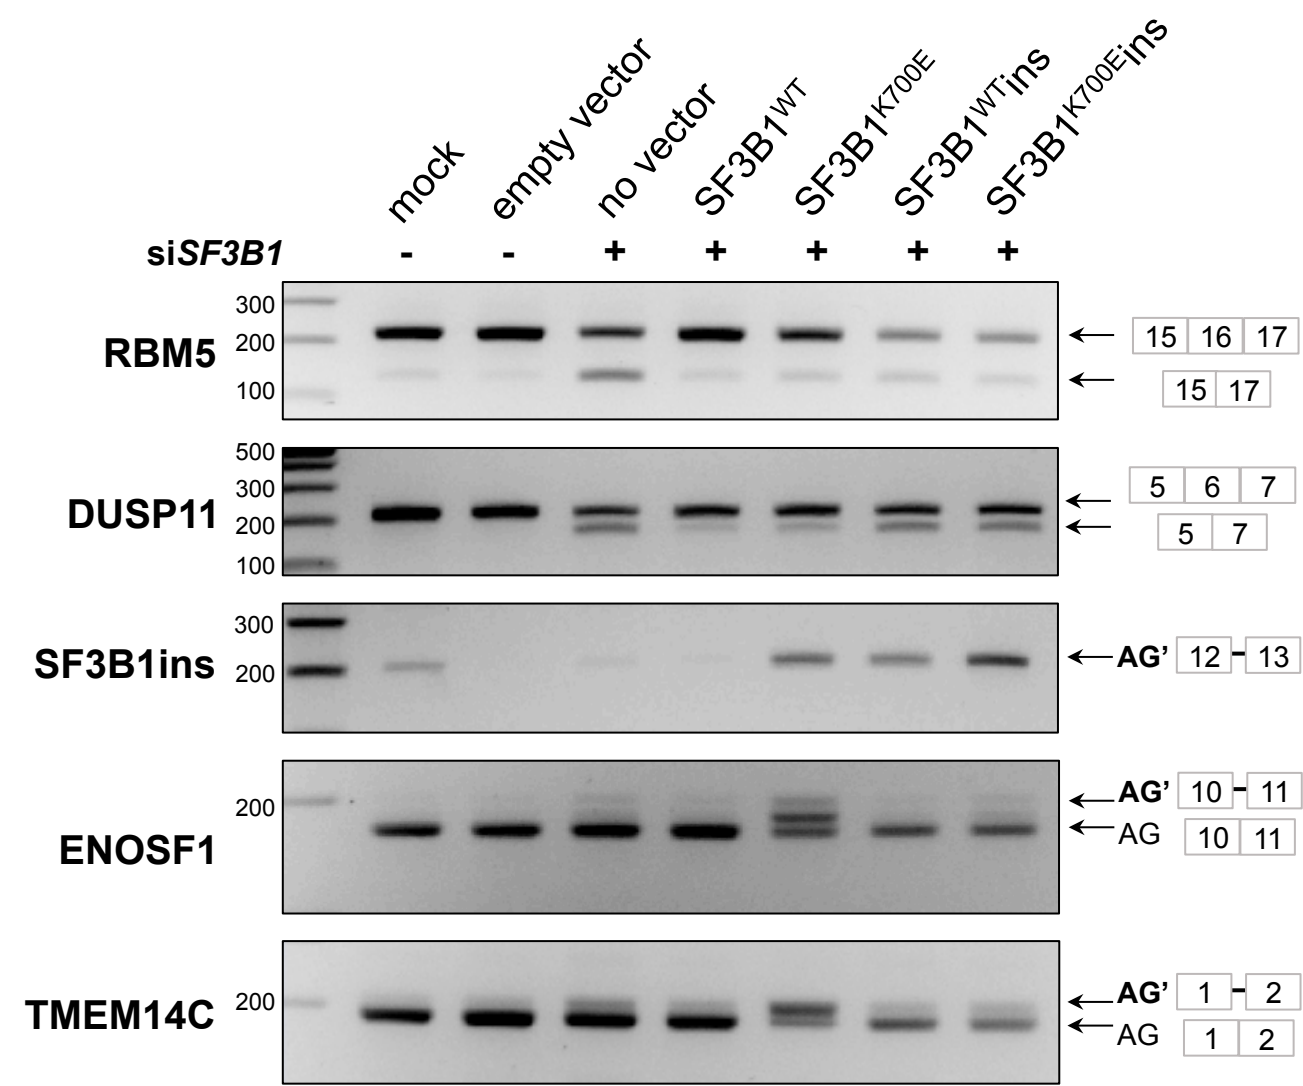

B

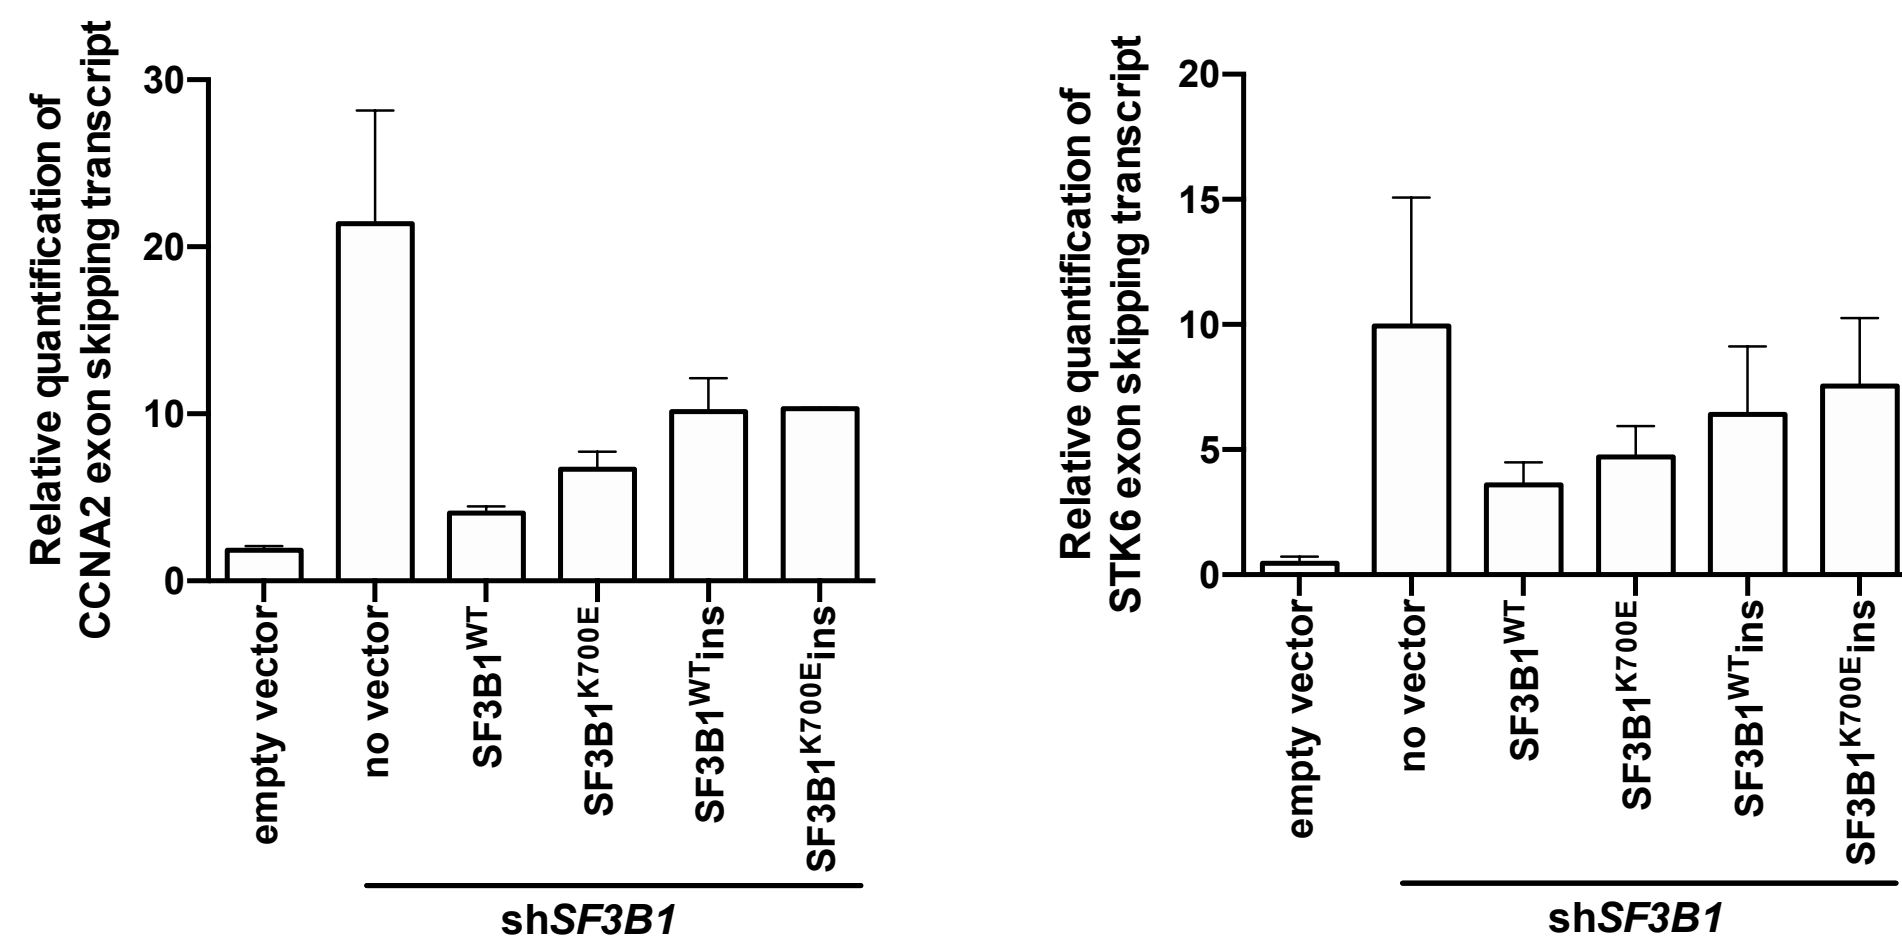

**Figure S4**

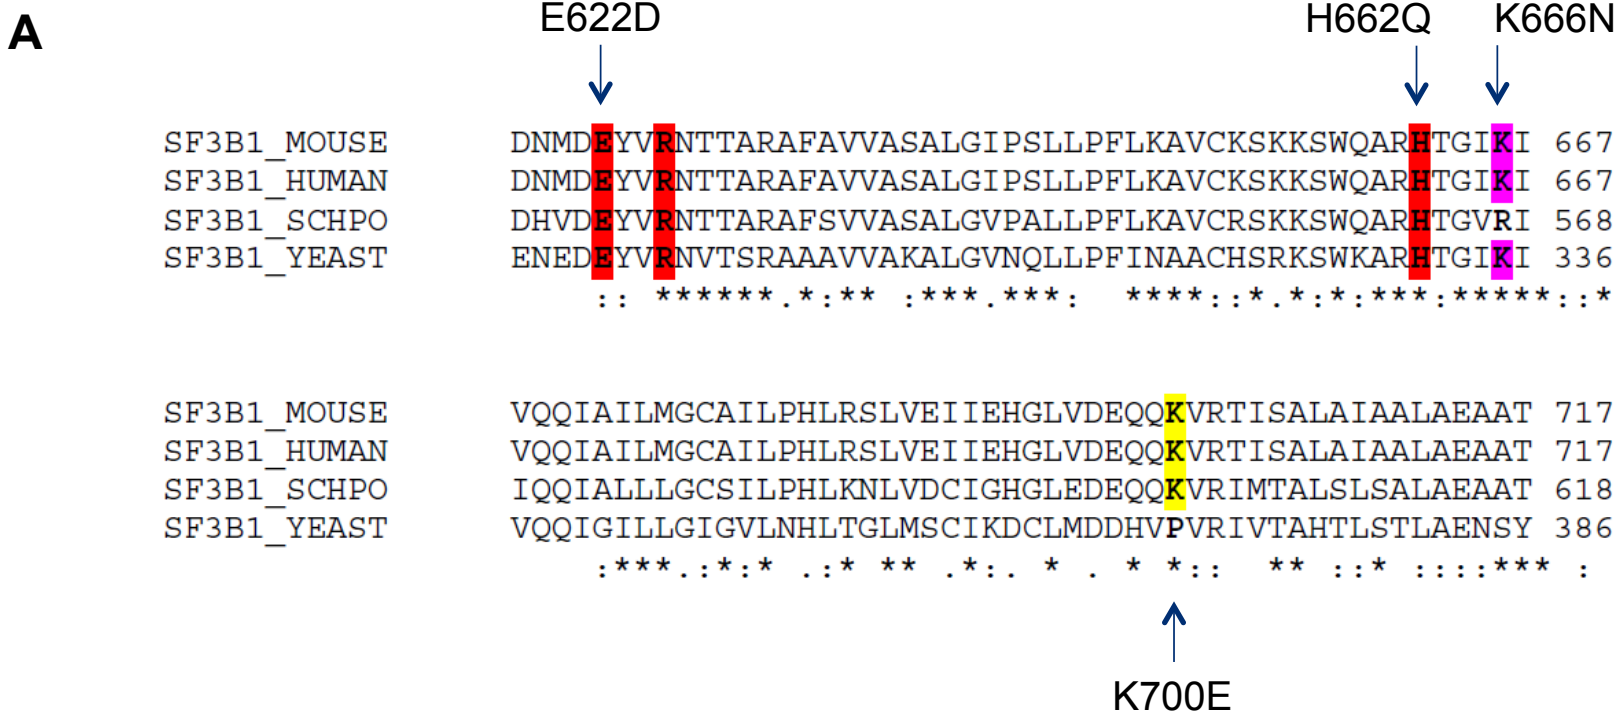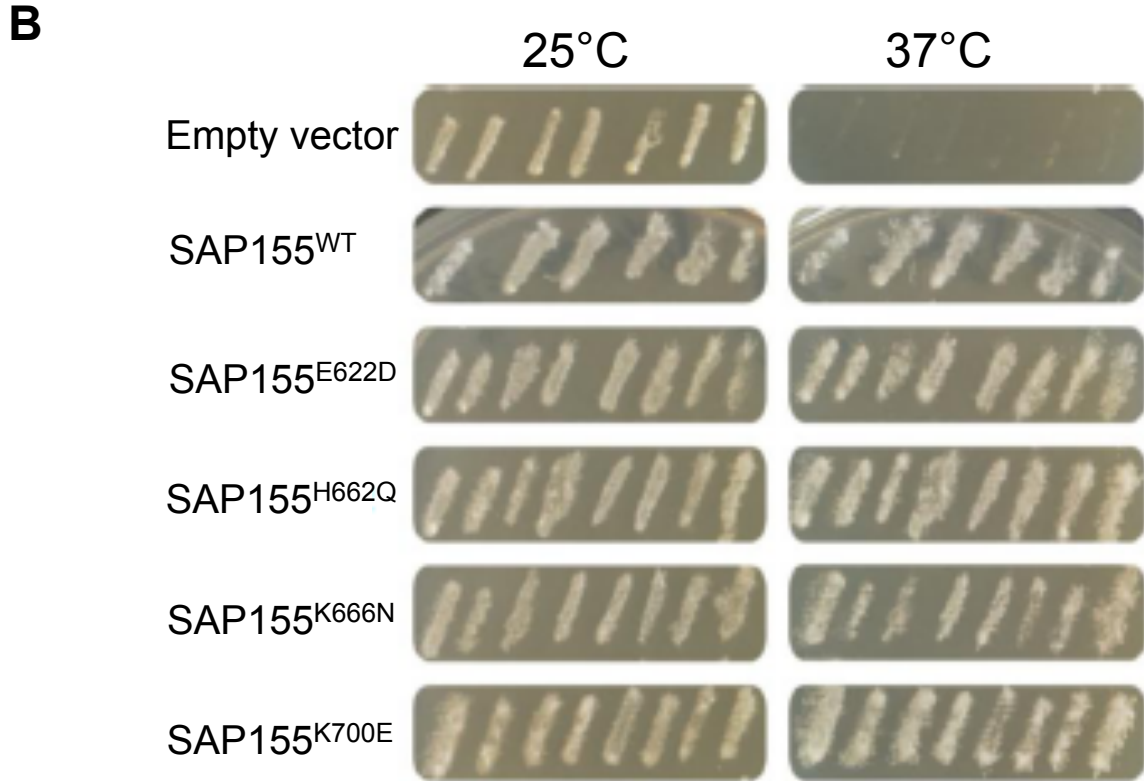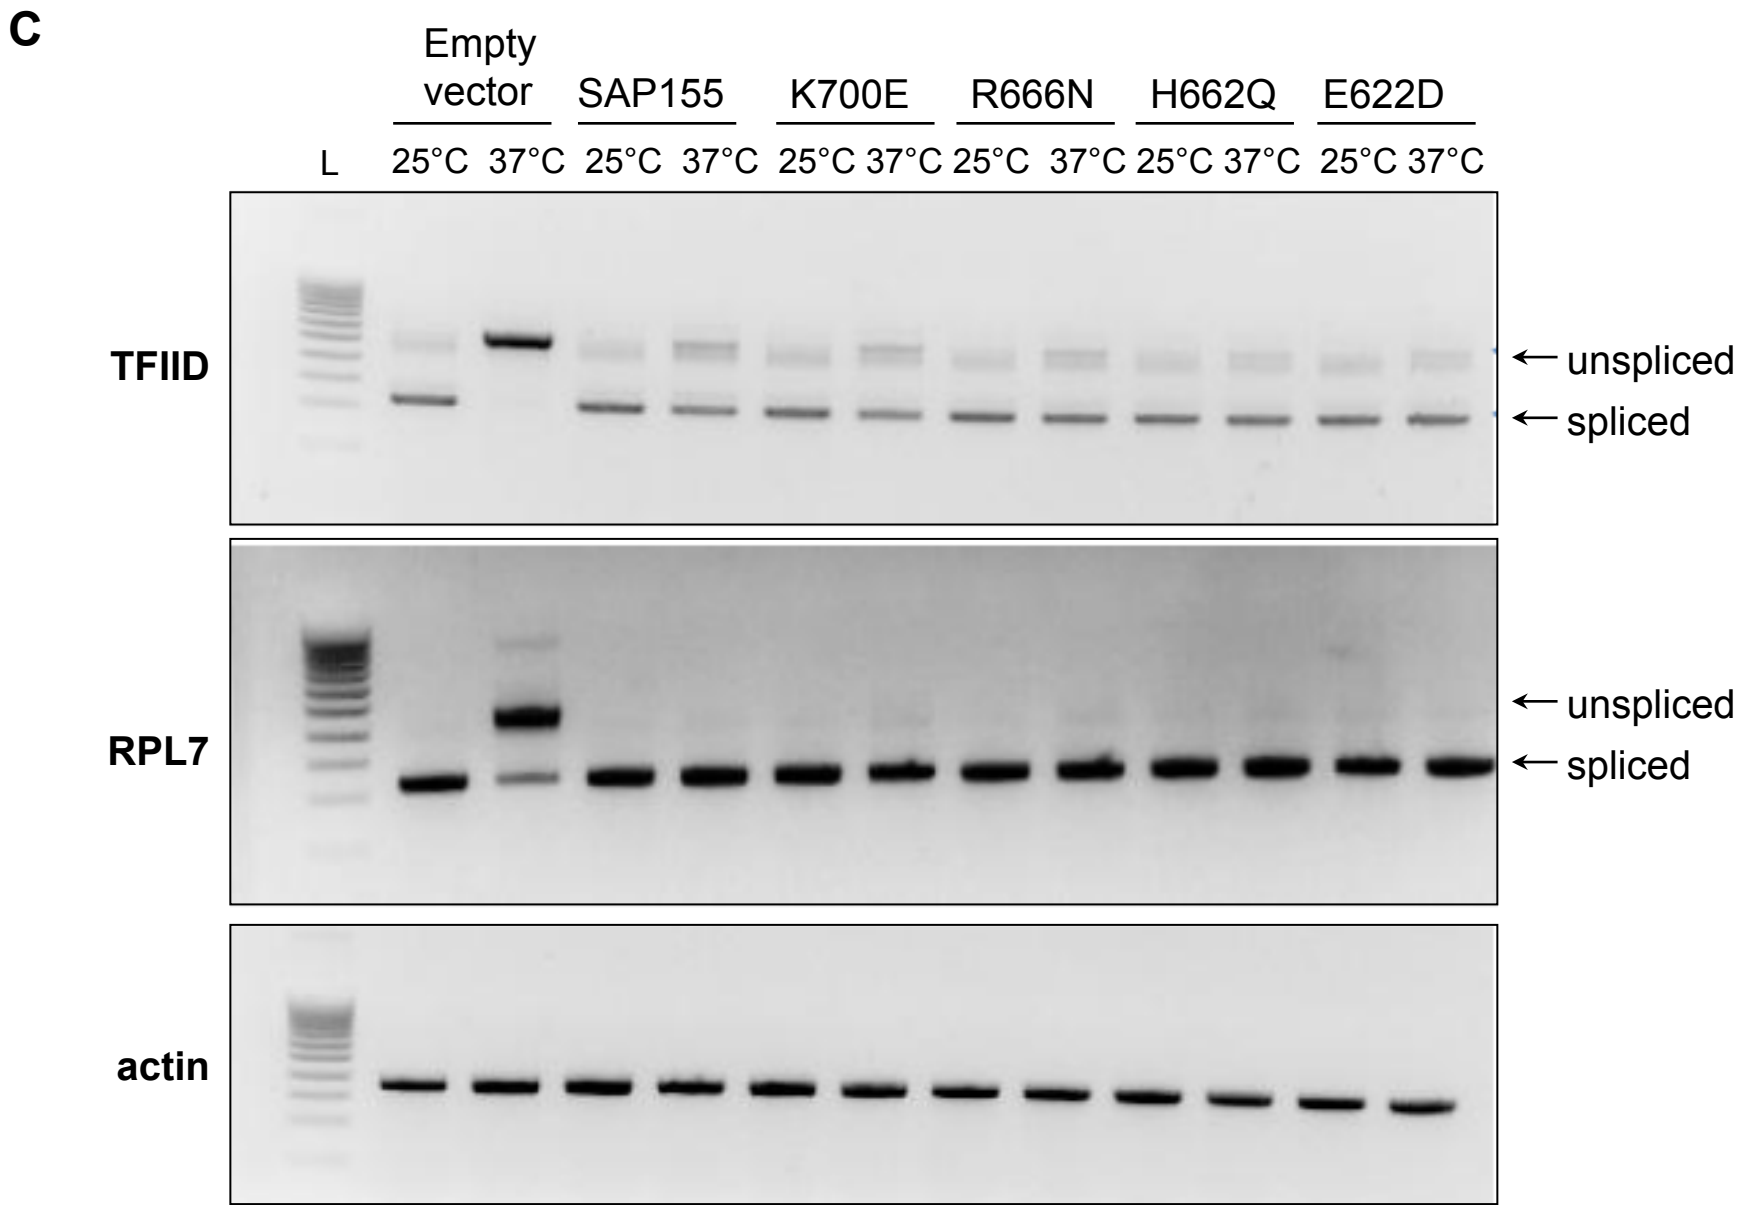



Figure S5

A

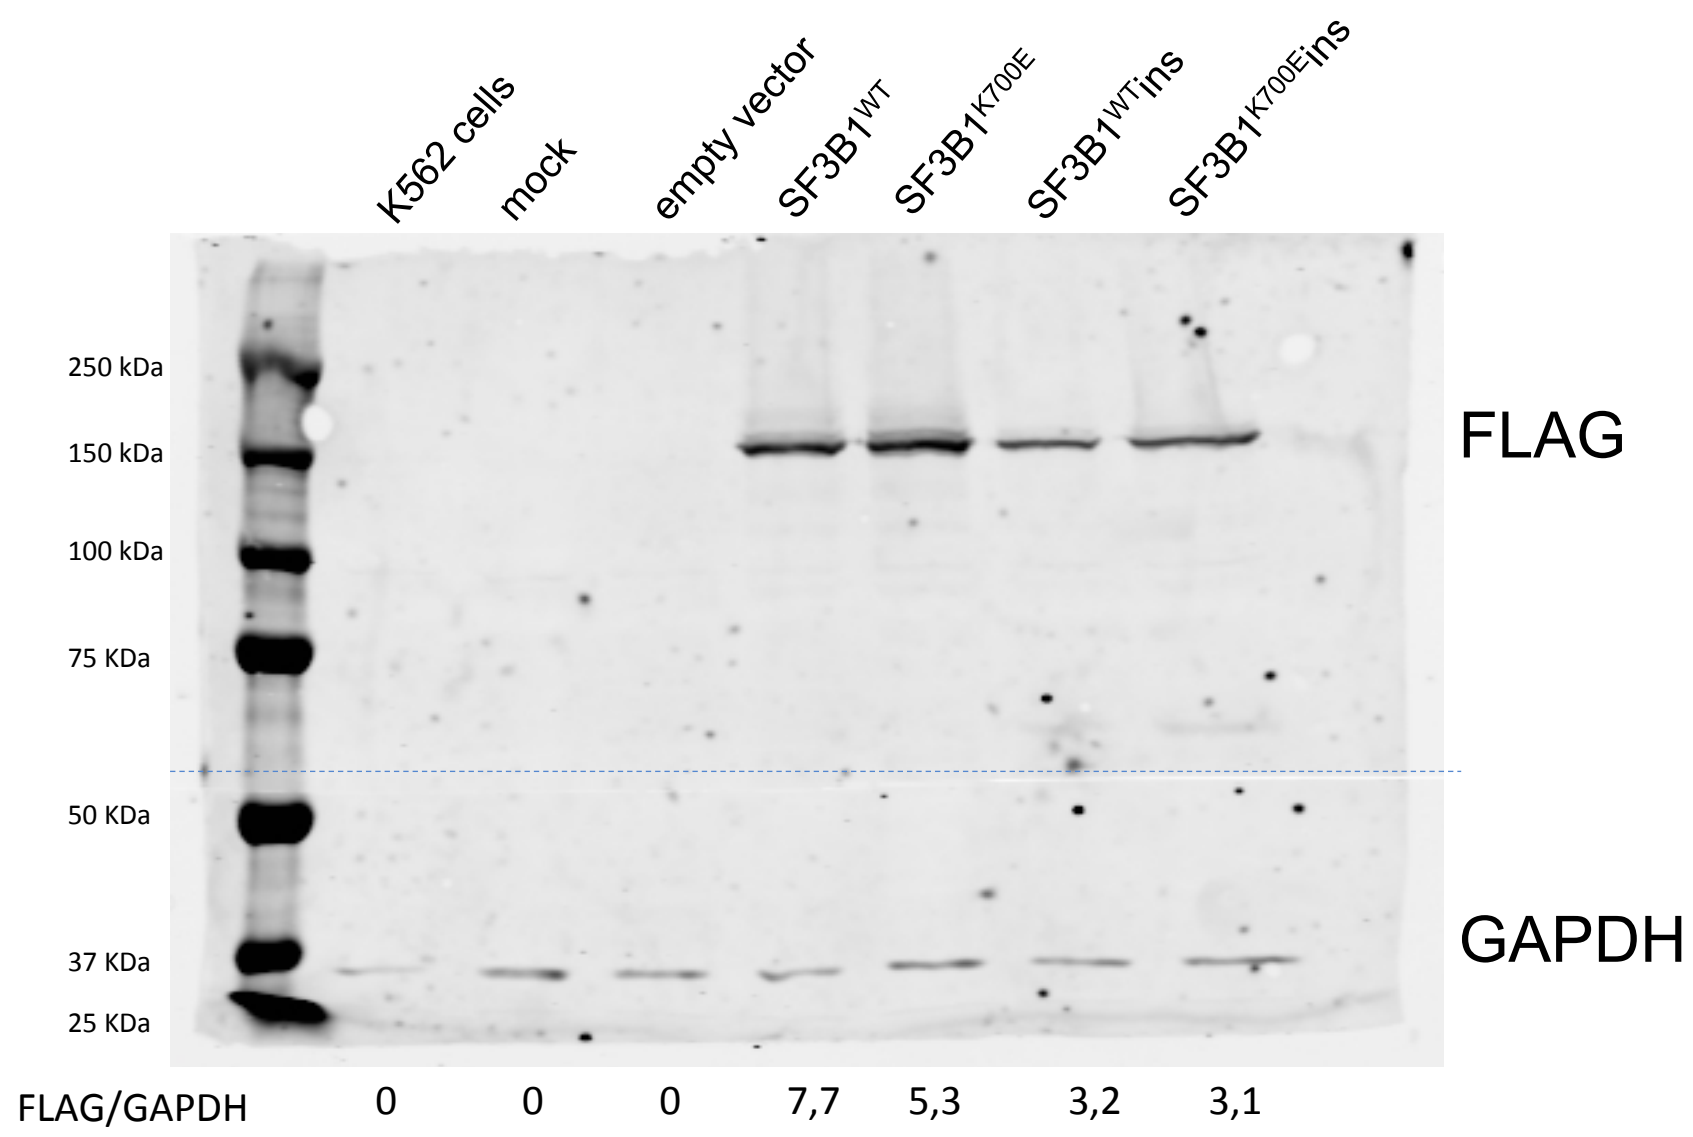

B

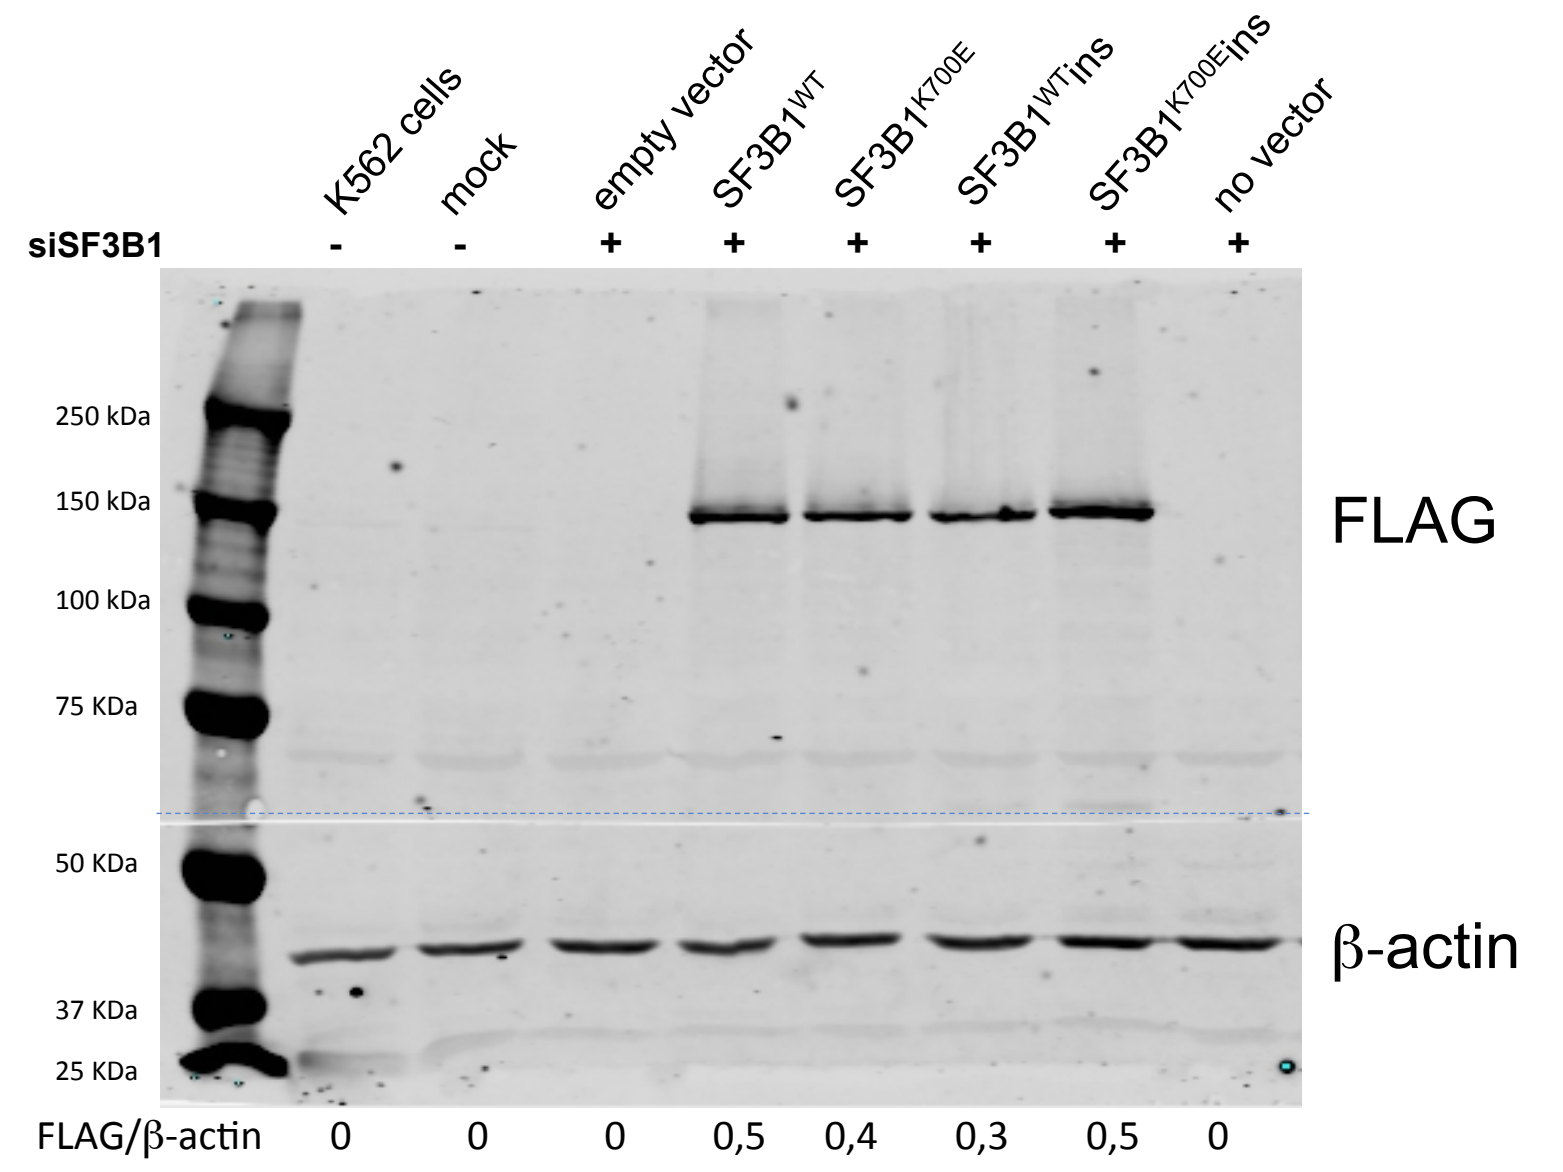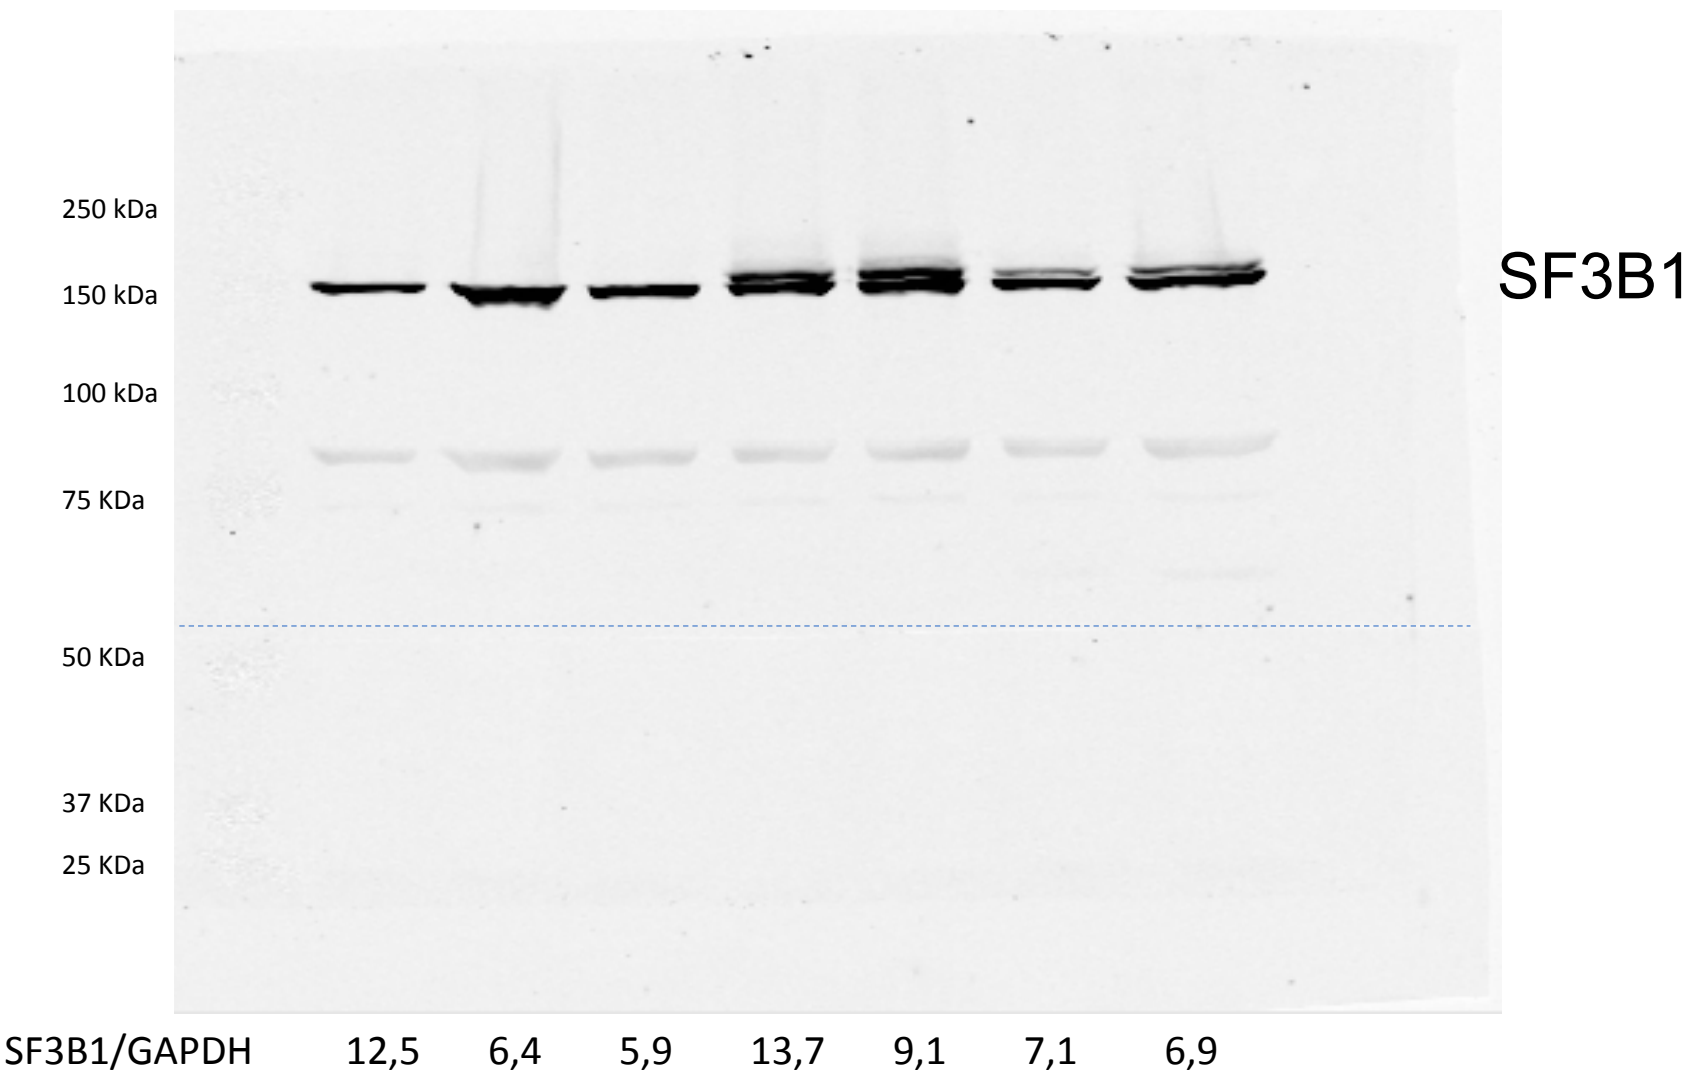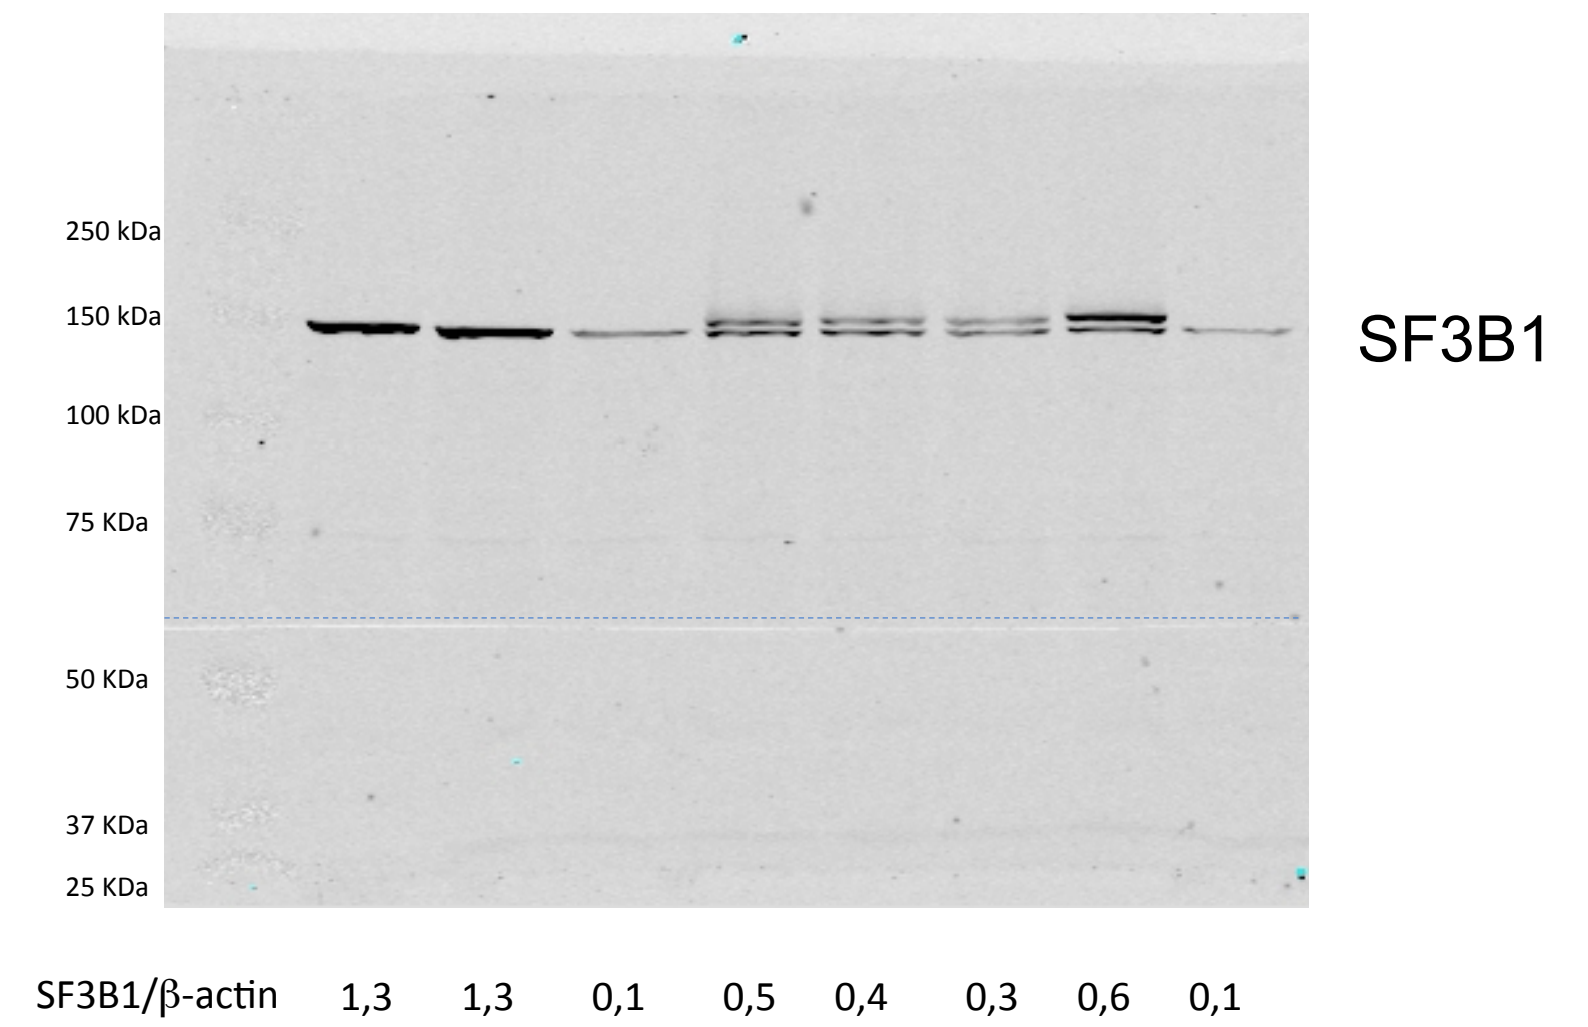

Membranes were cut to probe different antibodies (blue line)

**Figure S6**

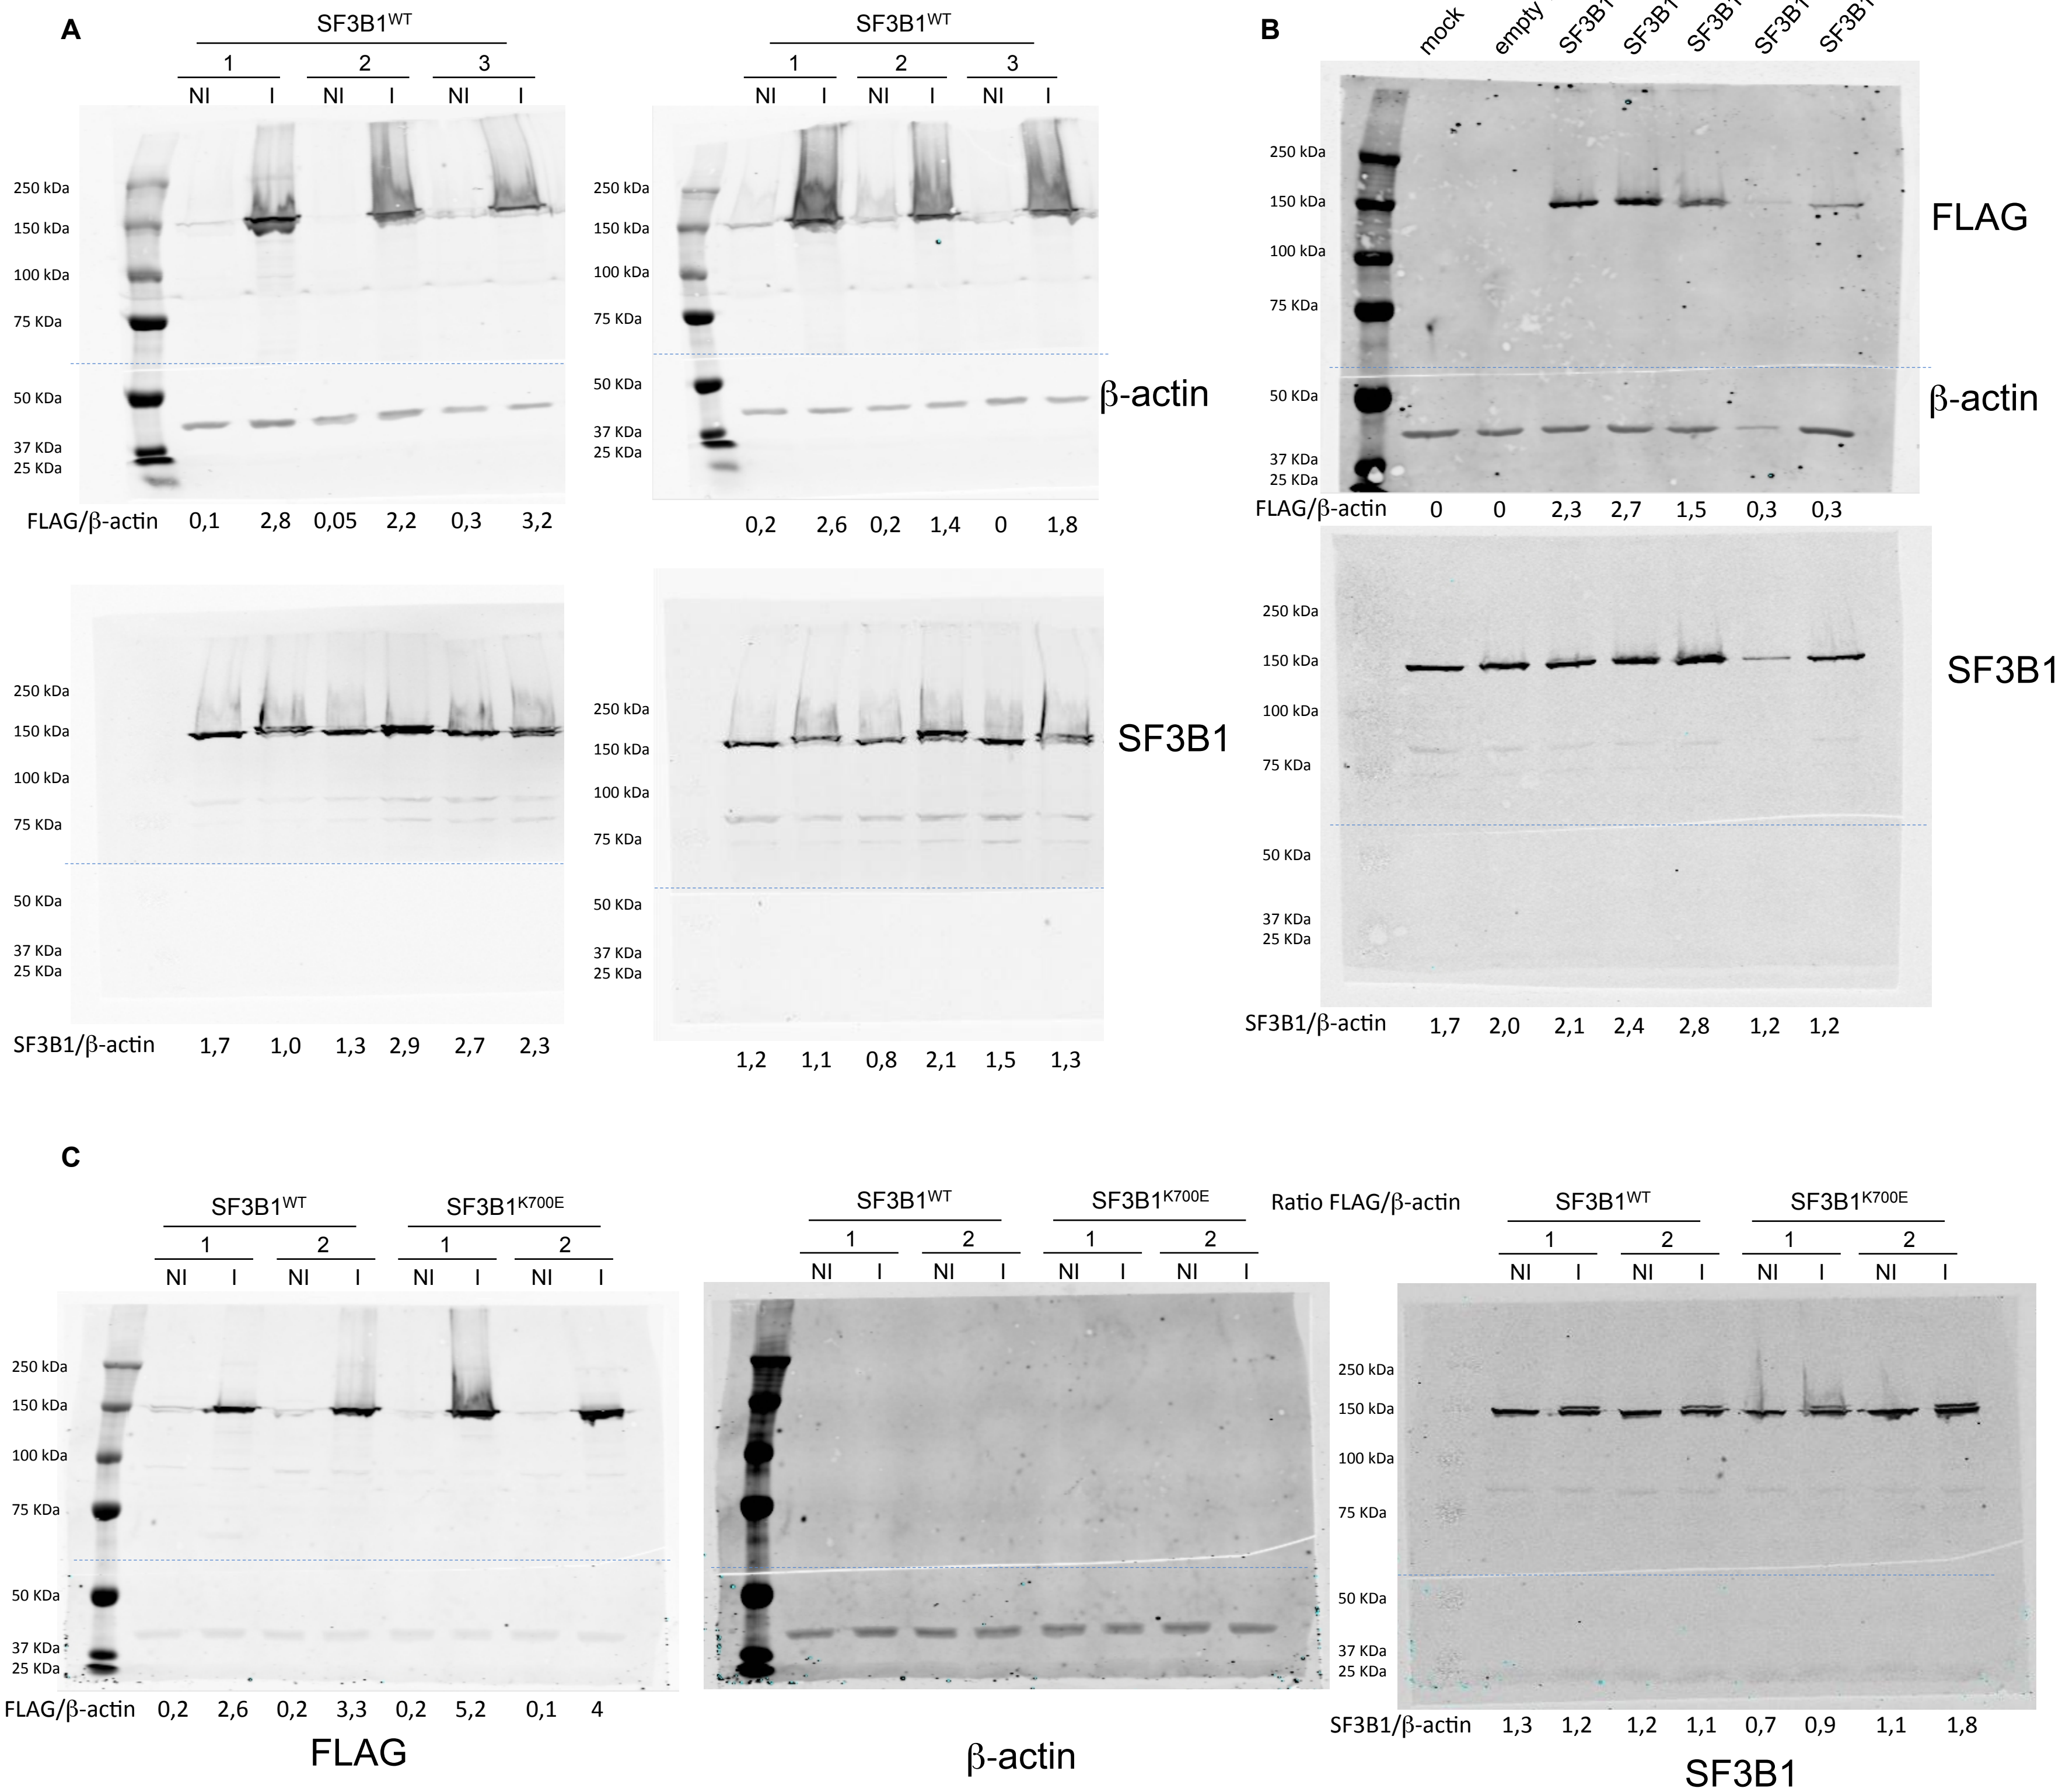

Membranes were cut to probe different antibodies (blue line)

Supplemental Table S1

| N° | Blood features            | Bone Marrow features | MDS classification according 2016 revision WHO classification | % RS | medullar karyotype | MDS Cytogenetic scoring system |
|----|---------------------------|----------------------|---------------------------------------------------------------|------|--------------------|--------------------------------|
| 1  | cytopenia                 | No dysmyelopoiesis   | ICUS                                                          | U    | normal             |                                |
| 2  | cytopenia                 | No dysmyelopoiesis   | ICUS                                                          | U    | normal             |                                |
| 3  | cytopenia                 | No dysmyelopoiesis   | ICUS                                                          | 0%   | normal             |                                |
| 4  | cytopenia                 | No dysmyelopoiesis   | ICUS                                                          | 0%   | normal             |                                |
| 5  | anemia                    | Dysmyelopoiesis      | MDS-SLD                                                       | 0%   | normal             | good prognosis                 |
| 6  | anemia                    | Dysmyelopoiesis      | MDS-MLD                                                       | 0%   | normal             | good prognosis                 |
| 7  | anemia                    | Dysmyelopoiesis      | MDS-MLD                                                       | 0%   | normal             | good prognosis                 |
| 8  | anemia                    | Dysmyelopoiesis      | MDS-MLD                                                       | 0%   | normal             | good prognosis                 |
| 9  | anemia                    | Dysmyelopoiesis      | MDS-MLD                                                       | 0%   | normal             | good prognosis                 |
| 10 | thrombopenia, neutropenia | Dysmyelopoiesis      | MDS-MLD                                                       | 0%   | normal             | good prognosis                 |

| N° | Blood features         | Bone Marrow features | MDS classification according 2016 revision WHO classification | % RS | medullar karyotype                           | MDS Cytogenetic scoring system | SF3B1 status (allele burden) | other mutated genes (NGS) |
|----|------------------------|----------------------|---------------------------------------------------------------|------|----------------------------------------------|--------------------------------|------------------------------|---------------------------|
| 1  | pancytopenia           | Dysmyelopoiesis      | MDS-EB1                                                       | 44%  | 48,XY,+8,+12[5]/46,XY[38]                    | intermediate prognosis         | wild type                    | TET2, SRSF2, RUNX1        |
| 2  | thrombopenia           | Dysmyelopoiesis      | MDS-RS-MLD                                                    | 18%  | normal                                       | good prognosis                 | wild type                    | TET2, ZRSR2               |
| 3  | anemia                 | Dysmyelopoiesis      | MDS-RS-MLD                                                    | 53%  | 46,XY,del(20)(q11q13)[8]/45,X,-Y[8]/46,XY[7] | good prognosis                 | R625C (36,5%) R625L (7,3%)   | TET2                      |
| 4  | anemia                 | Dysmyelopoiesis      | MDS-RS-MLD                                                    | 70%  | normal                                       | good prognosis                 | K700E (37%)                  |                           |
| 5  | anemia                 | Dysmyelopoiesis      | MDS-RS-MLD                                                    | 15%  | normal                                       | good prognosis                 | E622D (41%)                  |                           |
| 6  | anemia, thrombopenia   | Dysmyelopoiesis      | MDS-RS-MLD                                                    | 62%  | normal                                       | good prognosis                 | del gly740 (46%)             | TET2, U2AF1, SH2B3        |
| 7  | anemia                 | Dysmyelopoiesis      | MDS-RS-SLD                                                    | 12%  | normal                                       | good prognosis                 | R625C (33%)                  | TET2, EZH2, ASXL1         |
| 8  | anemia                 | Dysmyelopoiesis      | MDS-RS-SLD                                                    | 61%  | normal                                       | good prognosis                 | K700E (28,8%)                |                           |
| 9  | anemia                 | Dysmyelopoiesis      | MDS-RS-SLD                                                    | 53%  | 45,X,-Y[12]/46,XY[9]                         | very good prognosis            | K666N (12,3%) H662D (4,4%)   | TP53                      |
| 10 | anemia                 | Dysmyelopoiesis      | MDS-RS-SLD                                                    | 70%  | normal                                       | good prognosis                 | E622D (40,35%)               |                           |
| 11 | anemia                 | Dysmyelopoiesis      | MDS-RS-SLD                                                    | 80%  | normal                                       | good prognosis                 | K666N (39%)                  |                           |
| 12 | anemia, thrombocytosis | Dysmyelopoiesis      | MDS/MPN-RS- with Thrombocytosis                               | 90%  | normal                                       | good prognosis                 | K700E (48%)                  | MPL, DNMT3A, JAK2, ETNK1  |

ICUS : Idiopathic Cytopenia of Undetermined Significance

MDS-SLD : MDS wth single lineage dysplasia

MDS-MLD : MDS wth multilineage dysplasia

MDS-EB1: MDS with excess blasts-1

MPN: myeloproliferative neoplasms

## Supplemental Table S2

|         |                     | Name gene | Primers sense        | exon number                  | Sequences                |
|---------|---------------------|-----------|----------------------|------------------------------|--------------------------|
|         |                     |           |                      |                              |                          |
| PCR     | <i>Homo sapiens</i> | SF3B1     | forward              | exon 12                      | GCTCGTGAATTTGGAGCTGG     |
|         |                     |           | reverse              | exon 13                      | GCGGTTCAATGACCACGAGG     |
|         |                     | SF3B1ins  | forward              | exon 12                      | GCATTGCGTCAGATTACTGA     |
|         |                     |           | reverse              | intron 12                    | CTGAAAAAGAGAAAAGAGAAGAAG |
|         |                     | DPH5      | forward              | exon 4                       | CTGTAGGCTGCTGTGGTTTAC    |
|         |                     |           | reverse              | exon 7-intron 7              | CCTTCCCTATAGGCAGAAA      |
|         |                     | TMEM14C*  | forward              | exon 1                       | GACACCTCGCAGTCATTCT      |
|         |                     |           | reverse              | exon 3                       | TGATCCACCAGAAGCAACC      |
|         | ENOSF1*             | forward   | exon 10              | GGGTGCTGATCTCCAGGATG         |                          |
|         |                     | reverse   | exon 11              | GGAGGTTGGCTCCTCAATCC         |                          |
|         | RBM5                | forward   | exon 15              | GGCTGTAGTGTCCAGAGTC          |                          |
|         |                     | reverse   | exon 17              | GCCCTGTTGTCGGATCATAG         |                          |
|         | DUSP11              | forward   | exon 5               | GGACTGGCTACCTCATTTC          |                          |
|         |                     | reverse   | exon 8               | GACTGTTGCATGAGATGTGC         |                          |
|         | <i>S.pombe</i>      | TFIID     | forward              | exon 1                       | TTCCTGTTCTCCCAATGC       |
|         |                     |           | reverse              | exon 2                       | ACTTGGGTTACGGATACGC      |
| NDA3    |                     | forward   | exon 5               | CGAGCAAATTCGCTCTGTTC         |                          |
|         |                     | reverse   | exon 6               | CATTGCAGAAAATGATCACC         |                          |
| RPL7    |                     | forward   | exon 1               | GTGTTGAGCAGGCTATTGCC         |                          |
|         |                     | reverse   | exon 2               | GCGTAATAAGCGCAGAATTTGCGAATTT |                          |
| Actin   | forward             | /         | GATTGTCGGTAGACCCCGTC |                              |                          |
|         | reverse             | /         | CAGTCAACAAGCAAGGGTGC |                              |                          |
| qRT-PCR | <i>Homo sapiens</i> | CCNA2     | forward              | exon 4-exon 6                | TGCTATGCTGTTAGCCTCTTTT   |
|         |                     |           | reverse              | exon 6                       | CCGGTGACTGTAGAGTGC       |
|         |                     | STK6      | forward              | exon 3-exon 7                | CTGCCATCGGCACCTGTATAT    |
|         |                     |           | reverse              | exon 7                       | GCATGACTGACCACCAAAA      |

\* Primers from Dolatshad et al., 2016.

|              |                     | Name         | Primers sense                                | Application | Sequences                                 |
|--------------|---------------------|--------------|----------------------------------------------|-------------|-------------------------------------------|
|              |                     |              |                                              |             |                                           |
| Cloning      | <i>Homo sapiens</i> | SF3B1 E622D  | forward                                      | mutagenesis | CCAGATATTGACAACATGGACGATTACGTGAGGAATACCAC |
|              |                     |              | reverse                                      |             | GTGGTATTCTCACGTAATCGTCCATGTTGTCAATATCTGG  |
|              |                     | SF3B1 H662Q  | forward                                      |             | AAAGTTGGCAGGCCCGCCAGACCCGCATCAAGATTGTGC   |
|              |                     |              | reverse                                      |             | GCACAATCTTGATGCCGGTCTGGCGGGCTGCCAACTAA    |
|              |                     | SF3B1 K666E  | forward                                      |             | GCCCGCCACCCGGCATCGAGATTGTGCGAGATCGCA      |
|              |                     |              | reverse                                      |             | TGCGATCTGTGCACAATCTCGATGCCGGTGTGGCGGGC    |
|              |                     | pCW57.1      | forward                                      |             | GTACAAACTTGTGATGCTAGC                     |
|              |                     |              | reverse                                      |             | GGTTTAGTAATGAACCGGTC                      |
|              | SF3B1               | forward      | GCTAGCATCAACAAGTTGTACCGCCACCATGGATTACAAG     |             |                                           |
|              |                     | reverse      | ACCGGTTCACTAAACCCCTACAGGATGTAGTCCAGTTCTGTAAC |             |                                           |
|              | SF3B1ins            | forward      | CTTCTTCTCTTTCTCTTTTTCAGATCCTGGTGGTCAATGAGCC  |             |                                           |
|              |                     | reverse      | CTTATGGACGTAGGGACGCAC                        |             |                                           |
|              | <i>S.pombe</i>      | SAP155 K700E | forward                                      | mutagenesis | GAAGATGAACAACAAGAAGTACGAATTATGAC          |
|              |                     |              | reverse                                      |             | GTACATAATTCGTAATCTTGTGTTTCATCTTC          |
|              |                     | SAP155 R666N | forward                                      |             | CCAGGCATACTGGCGTTAACATTATTCACAGATTGC      |
|              |                     |              | reverse                                      |             | GCAATCTGTTGAATAATGTTAACGCCAGTATGCCTGG     |
|              |                     | SAP155 H662Q | forward                                      |             | CATGGCAAGCCAGGCAAACTGGCGTTTCGATTATTC      |
|              |                     |              | reverse                                      |             | GAATAATCCGAACGCCAGTTTGCCTGGCTTGCCATC      |
| SAP155 E662D |                     | forward      | GATCATGTCGACGACTATGTCGAAACACC                |             |                                           |
|              |                     | reverse      | GGTGTTCGGACATAGTCGTCGACATGATC                |             |                                           |
